# Supplementary material
Source: PubMed Central journal article supplement (PMC6620719)
Supplement: bm9b00527_si_001.pdf [file bm9b00527_si_001.pdf]

## Supporting Information

# Acetylated nanocellulose for single-component bioinks and cell proliferation on 3D-printed scaffolds

*Rubina Ajdary<sup>1</sup>, Siqi Huan<sup>1</sup>, Nazanin Zanzanizadeh Ezazi<sup>2</sup>, Wenchao Xiang<sup>1</sup>, Rafael Grande<sup>1</sup>, Hélder A. Santos<sup>2, 3\*</sup>, Orlando J. Rojas<sup>1\*</sup>*

<sup>1</sup>Department of Bioproducts and Biosystems, School of Chemical Engineering, Aalto University, P.O. Box 16300, FIN-00076 Aalto, Espoo, Finland

<sup>2</sup>Drug Research Program, Division of Pharmaceutical Chemistry and Technology, Faculty of Pharmacy, University of Helsinki, FI-00014 Helsinki, Finland

<sup>3</sup>Helsinki Institute of Life Science (HiLIFE), University of Helsinki, FI-00014 Helsinki, Finland

\*Authors for correspondence: Email: [orlando.rojas@aalto.fi](mailto:orlando.rojas@aalto.fi), Phone: +358 (0)505124227 (O.J.R.); [helder.santos@helsinki.fi](mailto:helder.santos@helsinki.fi), Phone: +358 (0) 40 846 1248 (H.A.S.).

This Supporting Information document includes reference to three (3) videos and four (4) figures in five (5) pages.

## Videos of 3D printing monocomponent nanocellulose inks

The videos, found online, display the process of 3D printing of CNF 1.88 wt%, TOCNF 1.7 wt% and AceCNF 0.5 wt%. Swelling of CNF after extrusion results in the “merging” of the extruded filaments while TOCN and AceCNF objects retain effectively their structure after 3D printing.

- (a) CNF
- (b) TOCNF
- (c) AceCNF

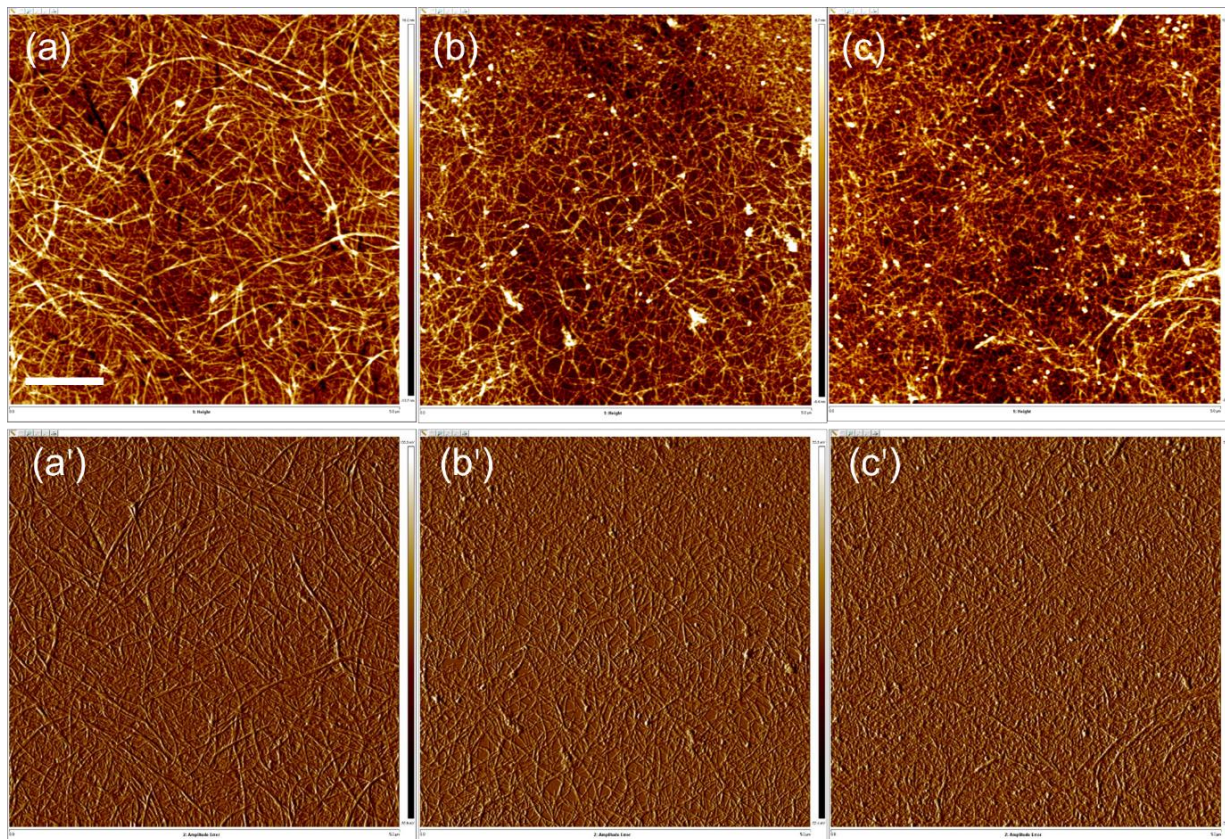

**Figure S1.** Atomic force microscopy (top) and amplitude error images of the samples. (a, a') CNF, (b, b') TOCNF and (c, c') AceCNF. The images are 5 μm x 5 μm and the scale bar is 1 μm.

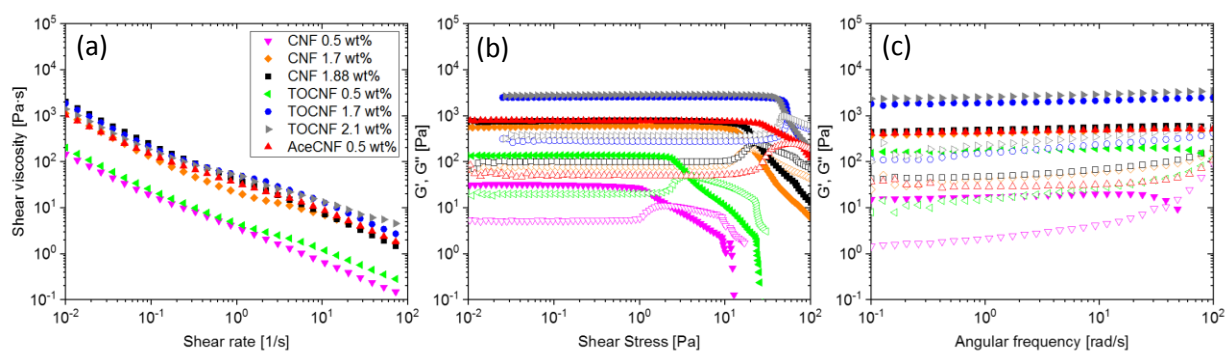

**Figure S2.** Rheological behavior of nanocellulose inks at the tested concentrations. (a) Viscosity flow curve; and storage and loss moduli as a function of (b) shear stress and (c) angular frequency. The solid and open symbols represent  $G'$  and  $G''$ , respectively.

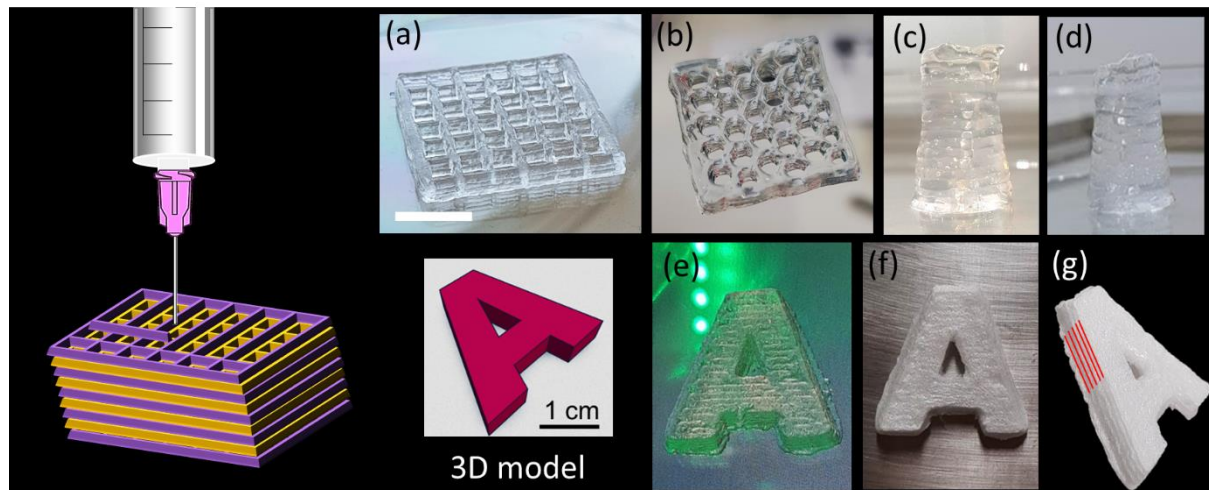

**Figure S3.** Schematic illustration of 3D printing with CNF ink of different structures: (a) Rectangular scaffold and (b) honeycomb infill pattern. (c-d) TOCNF, AceCNF layer deposition in a vertical structure of up to 2 cm in height. (e-g) 3D printing of letter “A” in wet and dry states as well as an illustration of layers deposition. The scale bar is 1 cm.

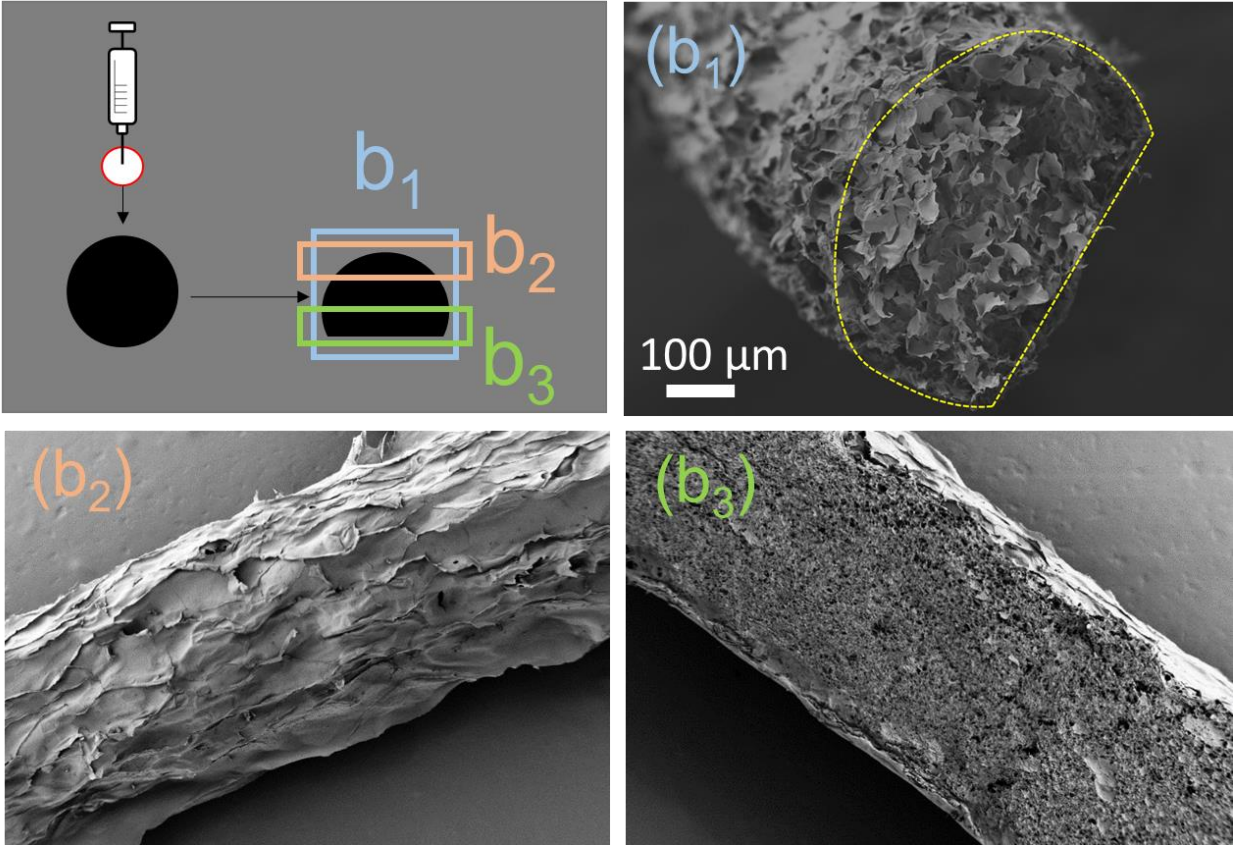

**Figure S4.** (a) Flattening of TOCNF filaments after 3D printing. (b<sub>1</sub>) TOCNF filament cross section. (b<sub>2</sub>) Rough (top) and (b<sub>3</sub>) porous (bottom) of TOCNF after 3D printing. The scale bar is 100 μm.
